# Supplementary material for: Anti-Inflammatory Activity of a CB2 Selective Cannabinoid Receptor Agonist: Signaling and Cytokines Release in Blood Mononuclear Cells
Source: MDPI journal article supplement (doi:10.3390/molecules27010064), 2021-12-23
Supplement: s1 [file s1]

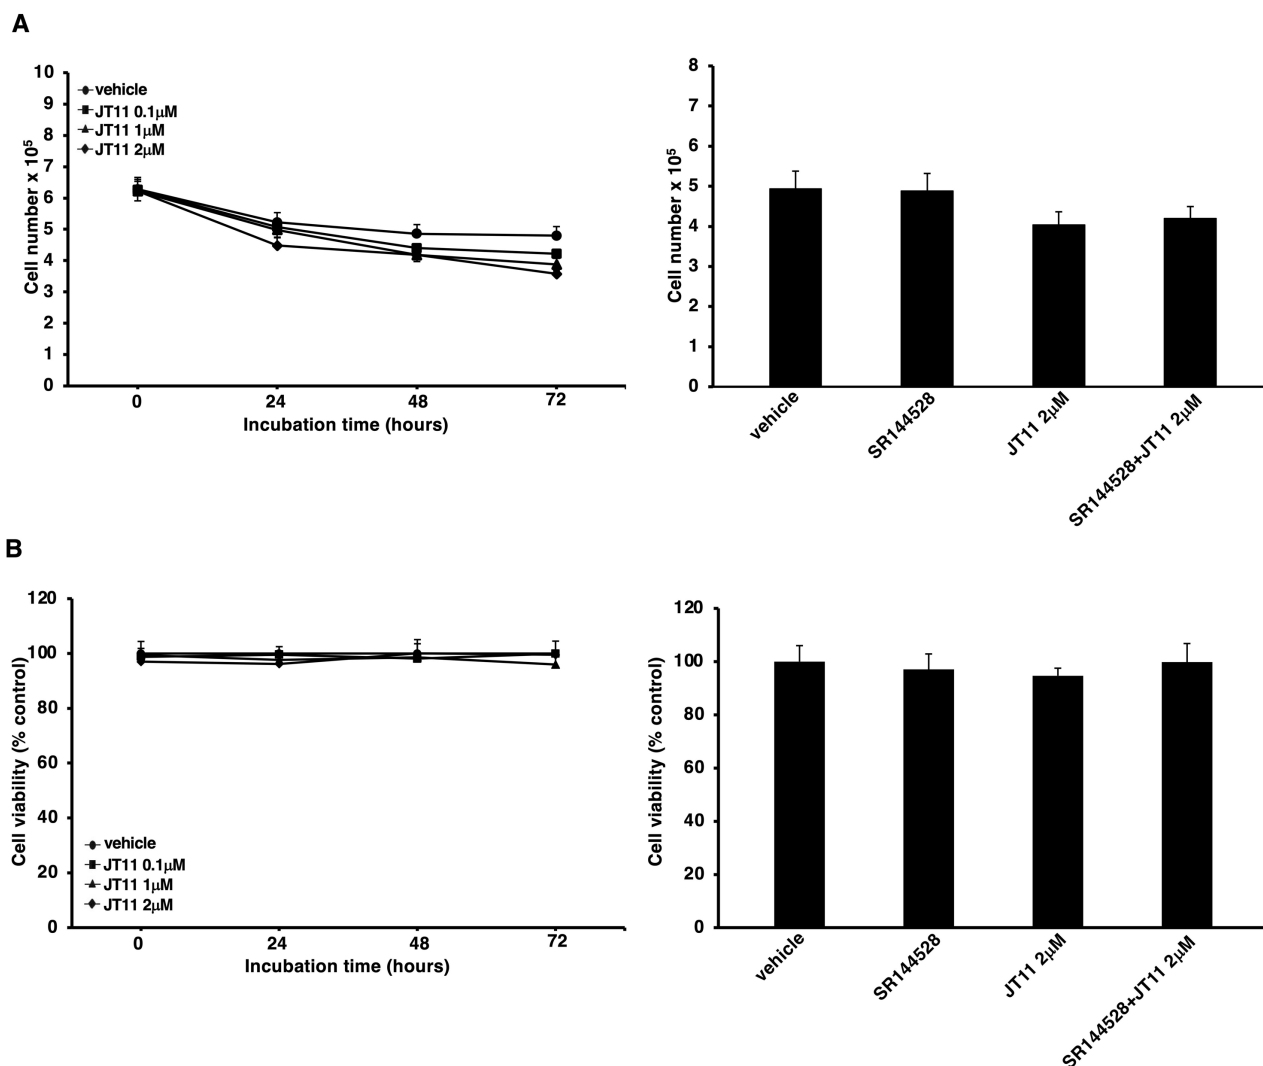

**Figure S1.** Trypan Blue and MTT analysis: JT11 effect on cell viability and proliferation.

PBMC were cultured with three different concentrations of compound (0.1 μM, 1 μM and 2 μM) for 24, 48 and 72 h. The number of viable cells was determined by Trypan Blue exclusion test (A) and cell proliferation was measured by 3-(4,5-dimethylthiazol-2-yl)-2,5-diphenyltetrazolium bromide (MTT) assay (B). Data are reported as the mean ± SD among ten independent experiments. Statistical analysis indicated: treated *vs* vehicle NS, not significant.
